# Supplementary material for: Addiction Treatment Capacity in Health Centers: The Role of Medicaid Reimbursement and Targeted Grant Funding
Source: Atypon-hosted journal article supplement (doi:10.1176/appi.ps.201900409), 2020-05-22
Supplement: appi.ps.201900409.ds001.pdf [file appi.ps.201900409.ds001.pdf]

## Appendix A

In April to June 2016, the research team sent the Health Center Survey to behavioral health directors. If a health center did not have a behavioral health director, the survey was sent to the medical director or another leader knowledgeable about the health center's behavioral health services. Respondents received a \$5 incentive for participating in the survey. Four of the 132 MWCN-affiliated health centers were deemed ineligible for the health center survey: three health centers offered limited primary care services (one reproductive health clinic and two community mental health clinics) and mail for one health center was returned undeliverable. Of the remaining health centers, 77 of the eligible 128 health centers returned completed surveys (60% response rate). Questionnaires were mailed up to 3 times approximately one month apart.

In October 2016 to March 2017, the research team contacted the 77 eligible health centers that had returned the Health Center Survey and requested the names and mailing addresses of their primary care providers (PCP). The Provider Survey was sent to 1115 primary care providers (i.e., physicians, advanced practice nurses, physician assistants) at 73 health centers; providers at four health centers were excluded from the sample because the health center did not share a list of names with contact information. Providers who worked at clinic sites serving only a pediatric population (e.g., school-based clinics) were excluded because of the overall survey's focus on Type 2 diabetes. Providers who were completing training (e.g., residents) were excluded because their time and experience at the health center was limited. Of the 538 providers who responded, 515 providers from 71 health centers were eligible for inclusion in this study. Adjusted for the unknown eligibility of non-responders, the response rate is 55%. The response

rate calculation was based on the American Association for Public Opinion Research (AAPOR)

Standard Definitions: Final Dispositions of Case Codes and Outcome Rates for Surveys.<sup>1</sup>

Appendix Table 1: Health Center Characteristics by Survey Response Status and Midwest Clinicians Network Membership Status

|                                                          | All Midwest<br>HCs<br>(N=262) | MWCN<br>Member HCs<br>(N=128) | Non-MWCN<br>Member HCs<br>(N=134) | Survey<br>Respondent HCs<br>(N=77) |
|----------------------------------------------------------|-------------------------------|-------------------------------|-----------------------------------|------------------------------------|
|                                                          | Mean (SD) / N<br>(%)          | Mean (SD) / N<br>(%)          | Mean (SD) /<br>N (%)              | Mean (SD) / N<br>(%)               |
| <b>State</b>                                             |                               |                               |                                   |                                    |
| Illinois                                                 | 47 (18%)                      | 21 (16%)                      | 26 (19%)                          | 16 (21%)                           |
| Indiana                                                  | 27 (10%)                      | 13 (10%)                      | 14 (10%)                          | 7 (9%)                             |
| Iowa                                                     | 14 (5%)                       | 6 (5%)                        | 8 (6%)                            | 4 (5%)                             |
| Kansas                                                   | 18 (7%)                       | 5 (4%)                        | 13 (10%)                          | 4 (5%)                             |
| Michigan                                                 | 40 (15%)                      | 24 (19%)                      | 16 (12%)                          | 15 (19%)                           |
| Minnesota                                                | 17 (6%)                       | 11 (9%)                       | 6 (4%)                            | 4 (5%)                             |
| Missouri                                                 | 29 (11%)                      | 11 (9%)                       | 18 (13%)                          | 8 (10%)                            |
| Nebraska                                                 | 7 (3%)                        | 4 (3%)                        | 3 (2%)                            | 0 (0%)                             |
| Ohio                                                     | 46 (18%)                      | 24 (19%)                      | 22 (16%)                          | 14 (18%)                           |
| Wisconsin                                                | 17 (6%)                       | 9 (7%)                        | 8 (6%)                            | 4 (5%)                             |
| <b>Location</b>                                          |                               |                               |                                   |                                    |
| Rural                                                    | 84 (32%)                      | 39 (30%)                      | 45 (34%)                          | 26 (34%)                           |
| Urban                                                    | 125 (48%)                     | 57 (45%)                      | 68 (51%)                          | 35 (45%)                           |
| Mixed                                                    | 52 (20%)                      | 32 (25%)                      | 20 (15%)                          | 16 (21%)                           |
| <b>Number of Sites</b>                                   |                               |                               |                                   |                                    |
| 1                                                        | 37 (14%)                      | 8 (6%)                        | 29 (22%)                          | 6 (8%)                             |
| 2-3                                                      | 74 (28%)                      | 37 (29%)                      | 37 (28%)                          | 23 (30%)                           |
| 4-5                                                      | 64 (25%)                      | 34 (27%)                      | 30 (23%)                          | 23 (30%)                           |
| ≥ 6                                                      | 86 (33%)                      | 49 (38%)                      | 37 (28%)                          | 25 (32%)                           |
| Medicaid expansion status as of<br>10/24/2016            | 191 (73%)                     | 99 (77%)                      | 92 (69%)                          | 61 (80%)                           |
|                                                          | 64 (25%)                      | 37 (29%)                      | 27 (20%)                          | 22 (29%)                           |
| Received FY2016 Substance Use Service<br>Expansion Award | 49 (19%)                      | 23 (18%)                      | 26 (20%)                          | 12 (16%)                           |
| Received Healthcare for the Homeless<br>Funding          | 16 (6%)                       | 13 (10%)                      | 3 (2%)                            | 6 (8%)                             |
| Received Migrant Health Funding                          |                               |                               |                                   |                                    |
| <b>Patient population</b>                                |                               |                               |                                   |                                    |
| Black/African American                                   | 27% (28%)                     | 25% (24%)                     | 28% (31%)                         | 26% (25%)                          |
| Hispanic/Latino                                          | 18% (21%)                     | 20% (23%)                     | 16% (19%)                         | 17% (21%)                          |
| <100% fed. poverty level                                 | 68% (18%)                     | 68% (16%)                     | 68% (19%)                         | 68% (17%)                          |

|           |           |           |           |           |
|-----------|-----------|-----------|-----------|-----------|
| Uninsured | 22% (16%) | 21% (15%) | 23% (16%) | 19% (13%) |
| Medicaid  | 51% (17%) | 51% (16%) | 50% (17%) | 52% (16%) |

---

Source: 2016 Uniform Data System and the Health Center Survey.

---

<sup>1</sup> American Association for Public Opinion Research (AAPOR) Standard Definitions: Final

Dispositions of Case Codes and Outcome Rates for Surveys. Available at:

[file:///C:/Users/joneseb/Downloads/Standard-Definitions20169theditionfinal%20\(1\).pdf](file:///C:/Users/joneseb/Downloads/Standard-Definitions20169theditionfinal%20(1).pdf)
